# Supplementary material for: The Role of Thyrotropin Receptor Activation in Adipogenesis and Modulation of Fat Phenotype
Source: PubMed Central journal article supplement (PMC5395630; doi:10.3389/fendo.2017.00083), 2017-04-19
Supplement: table_1.pdf [file table_1.pdf]

**Supplemental Table 1. QPCR primers used in this study indicating exon location.**

| Gene            | Forward Primer                    | Reverse Primer                    |
|-----------------|-----------------------------------|-----------------------------------|
| hAPRT           | GCTGCGTGCTCATCCGAAAG (Exon 3)     | CCTTAAGCGAGGTCAGCTCC (Exon 5)     |
| hLPL            | GAGATTTCTCTGTATGGACC (Exon 7)     | CTGCAAATGAGACACTTTCTC (Exon 9)    |
| hZIC1           | CCCTCAAGTGCAGGTTTGA (Exon 2)      | TGGACCTTCATGTGTTTGGC (Exon 3)     |
| hPRDM16         | AGAGATTCCGCGAGCCGACACCAT (Exon 1) | CTCCCCGGCTTCCATCTTCTCTT (Exon 2)  |
| hPGC-1 $\alpha$ | GAAGAGCGCCGTGTGATTTA (Exon 10-11) | CGCTGTCCCATGAGGTATTC (Exon 13)    |
| hUCP-1          | GGGGCTTCAGCGGCAAATCAG (Exon 2)    | TATAAGTCCCCGTGTAGCGAGGTT (Exon 3) |
| hCITED1         | CTCACCTGCGAAGGAGGATG (Exon 2)     | CCATTTGAGGCTACCCAGG (Exon 3)      |
| hLeptin         | AATGCATTGGGGAACCTGT (Exon 2)      | AGGAGACTGACTGCGTGTGT (Exon 3)     |
| hGAPDH          | ATGCCATCACTGCCACCCAGA (Exon 5)    | TGCCAGTGAGCTTCCCGTTCA (Exon 6)    |
